# Supplementary material for: First magmatism in the New England Batholith, Australia: forearc and arc–back-arc components in the Bakers Creek Suite gabbros
Source: Copernicus journal article supplement (doi:10.5194/se-8-421-2017), 2017-04-05
Supplement: Supplementary file [file se-8-421-2017-supplement-title-page.pdf › se-8-421-2017-supplement-title-page.pdf]

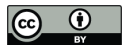

## *Supplement of*

# **First magmatism in the New England Batholith, Australia: forearc and arc–back-arc components in the Bakers Creek Suite gabbros**

**Seann J. McKibbin et al.**

*Correspondence to:* Seann J. McKibbin ([seann.mckibbin@gmail.com](mailto:seann.mckibbin@gmail.com), [seann.mckibbin@vub.ac.be](mailto:seann.mckibbin@vub.ac.be))

- [se-8-421-2017-supplement-title-page.pdf](#)
- [Supplement 1 Bulk rock geochemistry.xls](#)
- [Supplement 2 SHRIMP U-Pb data - this study.xls](#)
- [Supplement 3 New rejection criteria for literature U-Pb data.xls](#)
- [Supplement 4 NEO Chronology.xls](#)
- [Supplement 5 Additional methods.doc](#)
- [Supplement 5 Additional methods.pdf](#)
- [Supplement 5 Figure 1 Geochemistry ICPMS v XRF.png](#)
- [Supplement 5 Figure 2 BCR2g ICPMS.png](#)

The copyright of individual parts of the supplement might differ from the CC-BY 3.0 licence.
